# Supplementary material for: Inter-eye genomic heterogeneity in bilateral retinoblastoma via aqueous humor liquid biopsy
Source: PubMed Central journal article supplement (PMC8316348; doi:10.1038/s41698-021-00212-0), 2021-07-27
Supplement: 41698_2021_212_MOESM2_ESM.pdf [file 41698_2021_212_MOESM2_ESM.pdf]

## Reporting Summary

Nature Research wishes to improve the reproducibility of the work that we publish. This form provides structure for consistency and transparency in reporting. For further information on Nature Research policies, see our [Editorial Policies](#) and the [Editorial Policy Checklist](#).

### Statistics

For all statistical analyses, confirm that the following items are present in the figure legend, table legend, main text, or Methods section.

n/a Confirmed

- The exact sample size ( $n$ ) for each experimental group/condition, given as a discrete number and unit of measurement
- A statement on whether measurements were taken from distinct samples or whether the same sample was measured repeatedly
- The statistical test(s) used AND whether they are one- or two-sided  
*Only common tests should be described solely by name; describe more complex techniques in the Methods section.*
- A description of all covariates tested
- A description of any assumptions or corrections, such as tests of normality and adjustment for multiple comparisons
- A full description of the statistical parameters including central tendency (e.g. means) or other basic estimates (e.g. regression coefficient) AND variation (e.g. standard deviation) or associated estimates of uncertainty (e.g. confidence intervals)
- For null hypothesis testing, the test statistic (e.g.  $F$ ,  $t$ ,  $r$ ) with confidence intervals, effect sizes, degrees of freedom and  $P$  value noted  
*Give  $P$  values as exact values whenever suitable.*
- For Bayesian analysis, information on the choice of priors and Markov chain Monte Carlo settings
- For hierarchical and complex designs, identification of the appropriate level for tests and full reporting of outcomes
- Estimates of effect sizes (e.g. Cohen's  $d$ , Pearson's  $r$ ), indicating how they were calculated

*Our web collection on [statistics for biologists](#) contains articles on many of the points above.*

### Software and code

Policy information about [availability of computer code](#)

Data collection No software was used for data collection.

Data analysis ichorCNA software (available at <https://github.com/broadinstitute/ichorCNA>) is a standard tool for determining cell-free DNA tumor fraction in blood-based liquid biopsies.

For manuscripts utilizing custom algorithms or software that are central to the research but not yet described in published literature, software must be made available to editors and reviewers. We strongly encourage code deposition in a community repository (e.g. GitHub). See the Nature Research [guidelines for submitting code & software](#) for further information.

### Data

Policy information about [availability of data](#)

All manuscripts must include a [data availability statement](#). This statement should provide the following information, where applicable:

- Accession codes, unique identifiers, or web links for publicly available datasets
- A list of figures that have associated raw data
- A description of any restrictions on data availability

Most data generated or analyzed during this study are included in this published article (and its supplementary information files). Additional raw data generated during the current study are available from the corresponding author upon reasonable request.

## Field-specific reporting

Please select the one below that is the best fit for your research. If you are not sure, read the appropriate sections before making your selection.

Life sciences  Behavioural & social sciences  Ecological, evolutionary & environmental sciences

For a reference copy of the document with all sections, see [nature.com/documents/nr-reporting-summary-flat.pdf](https://nature.com/documents/nr-reporting-summary-flat.pdf)

## Life sciences study design

All studies must disclose on these points even when the disclosure is negative.

|                 |                                                                                                                                                                                                                                                                                                                                                                                                                                                                                                                                                                                                                                                                                                                                                                                                                                                         |
|-----------------|---------------------------------------------------------------------------------------------------------------------------------------------------------------------------------------------------------------------------------------------------------------------------------------------------------------------------------------------------------------------------------------------------------------------------------------------------------------------------------------------------------------------------------------------------------------------------------------------------------------------------------------------------------------------------------------------------------------------------------------------------------------------------------------------------------------------------------------------------------|
| Sample size     | 5 aqueous humor samples (3 samples from the right eye and 2 samples from the left eye) from one patient with bilateral retinoblastoma.                                                                                                                                                                                                                                                                                                                                                                                                                                                                                                                                                                                                                                                                                                                  |
| Data exclusions | No data was excluded.                                                                                                                                                                                                                                                                                                                                                                                                                                                                                                                                                                                                                                                                                                                                                                                                                                   |
| Replication     | Our methods of specimen collection, handling, storage, and processing have been standardized (Berry 2017, Berry 2018, Berry 2019, Xu 2020, Polski 2020). In previously published evaluation of >100 samples, less than 5% of aqueous samples were removed for quality control due to poor reads alignment ratio (Xu, 2020). We have previously reported concentrations of ctDNA isolated from AH samples (median 0.2 ng/ $\mu$ L, range 0.084-56 ng/ $\mu$ L) (Berry, 2018). We have confirmed analytical validity as evidenced by our high concordance rate with the matched tumor tissue from the left eye. In previous work, we have consistently reported concordances >95% (Berry 2017, Berry 2018, Xu 2020) and our methods of ctDNA extraction and sequencing have been standardized (Berry 2017, Berry 2018, Berry 2019, Xu 2020, Polski 2020). |
| Randomization   | This was a case report with a sample size of one patient. Randomization was not applicable to this study.                                                                                                                                                                                                                                                                                                                                                                                                                                                                                                                                                                                                                                                                                                                                               |
| Blinding        | This was a case report with a sample size of one patient. Blinding was not applicable to this study.                                                                                                                                                                                                                                                                                                                                                                                                                                                                                                                                                                                                                                                                                                                                                    |

## Reporting for specific materials, systems and methods

We require information from authors about some types of materials, experimental systems and methods used in many studies. Here, indicate whether each material, system or method listed is relevant to your study. If you are not sure if a list item applies to your research, read the appropriate section before selecting a response.

### Materials & experimental systems

| n/a                                 | Involvement in the study                                        |
|-------------------------------------|-----------------------------------------------------------------|
| <input checked="" type="checkbox"/> | <input type="checkbox"/> Antibodies                             |
| <input checked="" type="checkbox"/> | <input type="checkbox"/> Eukaryotic cell lines                  |
| <input checked="" type="checkbox"/> | <input type="checkbox"/> Palaeontology and archaeology          |
| <input checked="" type="checkbox"/> | <input type="checkbox"/> Animals and other organisms            |
| <input type="checkbox"/>            | <input checked="" type="checkbox"/> Human research participants |
| <input type="checkbox"/>            | <input checked="" type="checkbox"/> Clinical data               |
| <input checked="" type="checkbox"/> | <input type="checkbox"/> Dual use research of concern           |

### Methods

| n/a                                 | Involvement in the study                        |
|-------------------------------------|-------------------------------------------------|
| <input checked="" type="checkbox"/> | <input type="checkbox"/> ChIP-seq               |
| <input checked="" type="checkbox"/> | <input type="checkbox"/> Flow cytometry         |
| <input checked="" type="checkbox"/> | <input type="checkbox"/> MRI-based neuroimaging |

## Human research participants

Policy information about [studies involving human research participants](#)

|                            |                                                                                                                                                                                                                                                                    |
|----------------------------|--------------------------------------------------------------------------------------------------------------------------------------------------------------------------------------------------------------------------------------------------------------------|
| Population characteristics | One 13 month-old female patient with bilateral retinoblastoma with germline 13q and 16p12.2 deletions. The right eye was classified as International Intraocular Retinoblastoma Classification (IIRC) Group C / Stage cT2b; the left eye was Group D / Stage cT2b. |
| Recruitment                | One patient diagnosed with bilateral retinoblastoma in January 2017 at the Children's Hospital Los Angeles (CHLA). Written informed consent was obtained from the participant's parents prior to inclusion in the study.                                           |
| Ethics oversight           | This research was conducted under Institutional Review Board approval and adhered to the tenets of the Declaration of Helsinki.                                                                                                                                    |

Note that full information on the approval of the study protocol must also be provided in the manuscript.

## Clinical data

---

Policy information about [clinical studies](#)

All manuscripts should comply with the ICMJE [guidelines for publication of clinical research](#) and a completed [CONSORT checklist](#) must be included with all submissions.

|                             |                                                                  |
|-----------------------------|------------------------------------------------------------------|
| Clinical trial registration | <input type="text" value="This study was not a clinical trial"/> |
| Study protocol              | <input type="text" value="This study was not a clinical trial"/> |
| Data collection             | <input type="text" value="This study was not a clinical trial"/> |
| Outcomes                    | <input type="text" value="This study was not a clinical trial"/> |
